# Supplementary material for: Electrochemical Immunosensor for Ultra-Low Detection of Human Papillomavirus Biomarker for Cervical Cancer
Source: PubMed Central journal article supplement (PMC10391710; doi:10.1021/acssensors.3c00677), 2023-06-29
Supplement: se3c00677_si_001.pdf [file se3c00677_si_001.pdf]

## SUPPORTING INFORMATION

### **Electrochemical Immunosensor for Ultra-low Detection of Human Papillomavirus Biomarker for Cervical Cancer**

**Siwaphiwe Peteni<sup>1</sup>, Okoroike C. Ozoemena<sup>1#</sup>, Tobile Khawula<sup>1</sup>, Aderemi B. Haruna<sup>1</sup>,  
Frankie J. Rawson<sup>2</sup>, Leshweni J. Shai<sup>3</sup>, Oluwafunmilayo Ola<sup>4\*</sup>, and Kenneth I.  
Ozoemena<sup>1,\*</sup>**

*<sup>1</sup>Molecular science Institute, School of Chemistry, University of the Witwatersrand,  
Johannesburg, South Africa*

*<sup>2</sup>School of Pharmacy, Biodiscovery Institute, University of Nottingham, Nottingham, UK*

*<sup>3</sup>Department of Biomedical Sciences, Tshwane University of Technology, Pretoria,  
South Africa*

*<sup>4</sup>Advanced Materials Group, Faculty of Engineering, The University of Nottingham,  
Nottingham, UK*

---

\* Authors to whom correspondence should be addressed: O. Ola (email: [Oluwafunmilola.Ola@nottingham.ac.uk](mailto:Oluwafunmilola.Ola@nottingham.ac.uk)); and K.I. Ozoemena (e-mail: [Kenneth.ozoemena@wits.ac.za](mailto:Kenneth.ozoemena@wits.ac.za)).

# The author was a visiting student to the School of Chemistry, University of the Witwatersrand during this work. He has relocated to the Department of Chemistry, University of Guelph, Ontario, Canada.

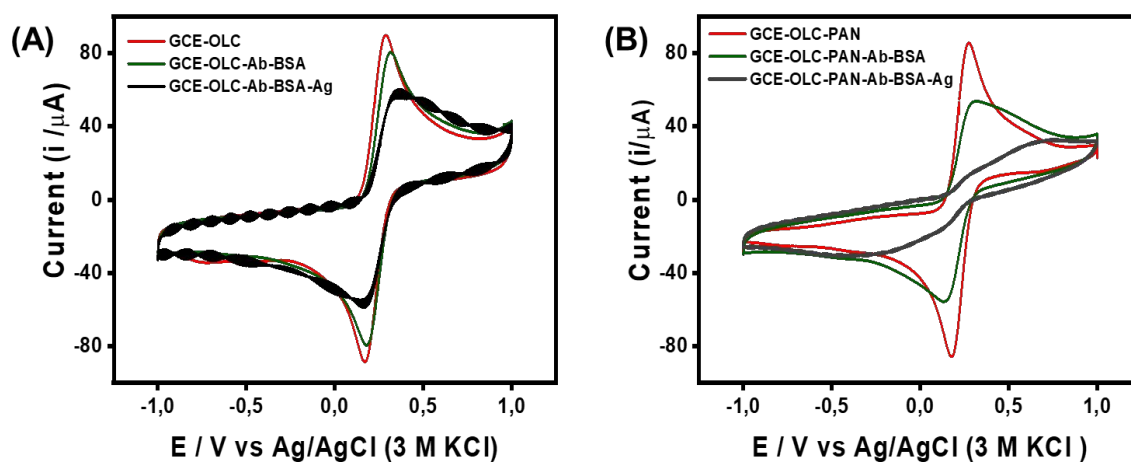

**Fig. S1:**Comparative cyclic voltammograms before and after antigen-antibody complexation: (A) OLC-based electrode and (B) OLC-PAN-based electrodes. All data were collected with HPV-16 L1 antigen ( $1.96 \times 10^{-12}$  mg/mL) in the redox probe ( $0.1 \text{ mM } [\text{Fe}(\text{CN})_6]^{4-}/[\text{Fe}(\text{CN})_6]^{3-}$  in PBS/AE, pH 7.4) at  $20 \text{ mVs}^{-1}$ .
